# Supplementary material for: Towards women-inclusive ecology: Representation, behavior, and perception of women at an international conference
Source: PLOS journal article supplement (doi:10.1371/journal.pone.0260163), 2021-12-10
Supplement: S1 (10.1371/journal.pone.0260163.s001) [file journal.pone.0260163.s001]

## TEMPLATE FOR OBSERVERS

**Session:**

**Date:**

**Time:**

**Speaker's Name:**

### BLOCK 1. GENERAL INFORMATION

| Question           | Answer                                        | Description                                                                                                                                                                                             |
|--------------------|-----------------------------------------------|---------------------------------------------------------------------------------------------------------------------------------------------------------------------------------------------------------|
| Observer           |                                               | Your name. This info will not be shared, it is only for queries.                                                                                                                                        |
| Speaker_Sex        | MALE / FEMALE                                 | Gender of the speaker.                                                                                                                                                                                  |
| Chair_Sex          | MALE / FEMALE                                 | Gender of the chair that introduced the speaker.                                                                                                                                                        |
| Talk_Topic         | F / T / M / TH / E<br>Bg / Pop / Bio / Others | Topic of the talk. <b>Options:</b> Freshwater (F) / Marine (M) / Terrestrial (T) / Theoretical (TH) / Evolution & Ethology (E) / Biogeochemistry (Bg) / Populations (Pop) / Biodiversity (Bio) / Others |
| Talk_Start_Ok      | YES / NO                                      | The talk started on time.                                                                                                                                                                               |
| Talk_Duration      |                                               | Duration of the talk <u>in minutes</u>                                                                                                                                                                  |
| Chair_Intervention | YES / NO                                      | The chair intervened because the speaker exceed his/her time.                                                                                                                                           |

### BLOCK 2. ATTENDANCE INFORMATION

Includes the attendances, the chairs, and the observer (i.e. you), but not the speaker. Please, be accurate. Count at least twice for each case (and more times if you have disagreement!). Avoid counting during the first or last minutes as people is usually coming in and out of the room (e.g. count the attendees between slide 5 and 6).

| Question         | Answer | Description                       |
|------------------|--------|-----------------------------------|
| Numer_Male       |        | Nmber of <u>male</u> attendees    |
| Number_Female    |        | Number of <u>female</u> attendees |
| Number_Attendees |        | Number of <u>total</u> attendees  |

### BLOCK 3. QUESTION TIME

| Question            | Answer                            | Description                                                                               |
|---------------------|-----------------------------------|-------------------------------------------------------------------------------------------|
| Silence_Period      | YES / NO                          | There was a silence period after the talk.                                                |
| Silence_Duration    |                                   | Duration of the silence period <u>in seconds</u>                                          |
| Chair_Question      | YES / NO<br>FIRST / LAST / UNIQUE | The chair asked a question. If yes, specify if it was the first, last or unique question. |
| No_Question         | YES / NO                          | No questions were asked in this talk.                                                     |
| 1_Question_Sex      | MALE / FEMALE                     | Gender of the attendee that asked the question                                            |
| 1_Question_Duration |                                   | Duration of the question <u>in seconds</u>                                                |
| 1_Answer_Duration   |                                   | Duration of the answer <u>in seconds</u>                                                  |
| 2_Question_Sex      | MALE / FEMALE                     | Gender of the attendee that asked the question                                            |
| 2_Question_Duration |                                   | Duration of the question <u>in seconds</u>                                                |
| 2_Answer_Duration   |                                   | Duration of the answer <u>in seconds</u>                                                  |
| 3_Question_Sex      | MALE / FEMALE                     | Gender of the attendee that asked the question                                            |
| 3_Question_Duration |                                   | Duration of the question <u>in seconds</u>                                                |
| 3_Answer_Duration   |                                   | Duration of the answer <u>in seconds</u>                                                  |
| 4_Question_Sex      | MALE / FEMALE                     | Gender of the attendee that asked the question                                            |
| 4_Question_Duration |                                   | Duration of the question <u>in seconds</u>                                                |
| 4_Answer_Duration   |                                   | Duration of the answer <u>in seconds</u>                                                  |
| 5_Question_Sex      | MALE / FEMALE                     | Gender of the attendee that asked the question                                            |
| 5_Question_Duration |                                   | Duration of the question <u>in seconds</u>                                                |
| 5_Answer_Duration   |                                   | Duration of the answer <u>in seconds</u>                                                  |
| 6_Question_Sex      | MALE / FEMALE                     | Gender of the attendee that asked the question                                            |
| 6_Question_Duration |                                   | Duration of the question <u>in seconds</u>                                                |
| 6_Answer_Duration   |                                   | Duration of the answer <u>in seconds</u>                                                  |
